# Supplementary material for: Atmospheric inputs of volcanic iron around Heard and McDonald Islands, Southern ocean
Source: Royal Society of Chemistry journal article supplement (doi:10.1039/d1ea00054c), 2021-01-01
Supplement: d1ea00054c1.pdf [file d1ea00054c1.pdf]

## Supplementary Material

### Atmospheric inputs of volcanic iron around Heard and McDonald Islands, Southern Ocean.

Morgane M. G. Perron <sup>1,\*</sup>, Bernadette C. Proemse <sup>1</sup>, Michal Strzelec <sup>1</sup>, Melanie Gault-Ringold <sup>2</sup>,  
Andrew R. Bowie <sup>1,2</sup>.

<sup>1</sup>Institute for Marine and Antarctic Studies, University of Tasmania, Battery Point, Tasmania, Australia.

<sup>2</sup>Antarctic Climate and Ecosystems CRC, University of Tasmania, Battery Point, Tasmania, Australia.

**Table S1.** Aerosol sampling log-sheet during the ‘HEOBI’ campaign including each sample’s ID, midpoint (mid-) latitude and longitude, sampling start and recovery date and time (dd/mm/yyyy hh:mm). Samples are ordered by decreasing estimated distance (km) to the west (W) and increasing distance to the east (E) of Heard Island (HI).

| <b>Sample ID</b> | <b>mid-latitude</b> | <b>mid-longitude</b> | <b>Sampling start (UTC)</b> | <b>Sampling recovery (UTC)</b> | <b>Distance to HI km / orientation</b> |    |
|------------------|---------------------|----------------------|-----------------------------|--------------------------------|----------------------------------------|----|
| <b>HEOBI-A7</b>  | -52.88              | 71.52                | 22/01/2016 12:00            | 24/01/2016 05:49               | 137                                    | W  |
| <b>HEOBI-A8</b>  | -53.02              | 72.48                | 24/01/2016 05:55            | 28/01/2016 01:39               | 71                                     | W  |
| <b>HEOBI-A10</b> | -53.04              | 72.66                | 01/02/2016 13:26            | 08/02/2016 01:34               | 58                                     | W  |
| <b>HEOBI-A9</b>  | -53.21              | 73.69                | 28/01/2016 02:09            | 01/02/2016 13:17               | 16                                     | SE |
| <b>HEOBI-A11</b> | -52.73              | 74.52                | 08/02/2016 01:47            | 13/02/2016 08:01               | 80                                     | NE |
| <b>HEOBI-A6</b>  | -51.29              | 73.77                | 20/01/2016 09:10            | 22/01/2016 03:22               | 202                                    | NE |
| <b>HEOBI-A5</b>  | -49.85              | 78.62                | 16/01/2016 06:15            | 19/01/2016 09:35               | 504                                    | NE |
| <b>HEOBI-A12</b> | -47.83              | 87.22                | 13/02/2016 08:19            | 19/02/2016 01:16               | 1131                                   | NE |
| <b>HEOBI-A4</b>  | -43.31              | 91.03                | 12/01/2016 14:30            | 16/01/2016 06:00               | 1686                                   | NE |
| <b>HEOBI-A3</b>  | -37.57              | 102.03               | 10/01/2016 12:45            | 12/01/2016 14:20               | 2789                                   | NE |
| <b>HEOBI-A2</b>  | -35.22              | 107.33               | 09/01/2016 13:26            | 10/01/2016 12:29               | 3304                                   | NE |
| <b>HEOBI-A13</b> | -40.52              | 115.95               | 19/02/2016 01:30            | 21/02/2016 11:28               | 3455                                   | NE |
| <b>HEOBI-A1</b>  | -33.64              | 113.00               | 08/01/2016 10:12            | 09/01/2016 13:04               | 3783                                   | NE |

Table S2. Recoveries (%) calculated based on the digestion of n aliquots of the Arizona Test Dust (ATD) fine fraction 0–3 µm (ATD, Powder Technology Inc., USA) during this study (n=1), during the protocol assessment study (n=3) from Perron et al. (2020), and using the laboratory averaged recovery (n=7).

|                         | Al  | Cr  | Fe  | Mo  | Ni   |
|-------------------------|-----|-----|-----|-----|------|
| HEOBI (this study)      | 98  | 94  | 92  | 78* | 126* |
| Perron et al., 2020     | 99  |     | 102 |     |      |
| Home laboratory average | 103 | 102 | 96  | 89  | 122  |

\*Measurements of Mo and Ni in aerosols were not corrected for their small deviation to 100% recovery because these elements were only used for comparing measurements obtained between samples from this study rather than comparing measurement to previous studies.

Table S3. Details associated with rock samples dredged during the “HEOBI” campaign including sample collection date and location (latitude and longitude) and a visual description of the rock.

| Sample ID | Collection date | Latitude | Longitude | Visual classification | Composition | Physiographic features         |
|-----------|-----------------|----------|-----------|-----------------------|-------------|--------------------------------|
| R1        | 08/02/2016      | -52.969  | 73.529    | Lava                  | Basanite    | Seamount North of Heard        |
| R2        | 03/02/2016      | -53.282  | 73.323    | Lava                  | Basanite    | Debris avalanche East of Heard |
| R3        | 03/02/2016      | -53.251  | 73.230    | Lava                  | Basalt      | Debris avalanche West of Heard |
| R4        | 05/02/2016      | -53.05   | 72.56     | Lava                  | Phonolite   | Seamount West of McDonalds     |
| R5        | 29/01/2016      | -53.0    | 72.57     | Volcanic glass        | Phonolite   | Seamount North of McDonalds    |
| R6        | 29/01/2016      | -53.0    | 72.57     | Lava                  | Phonolite   | Seamount North of McDonalds    |



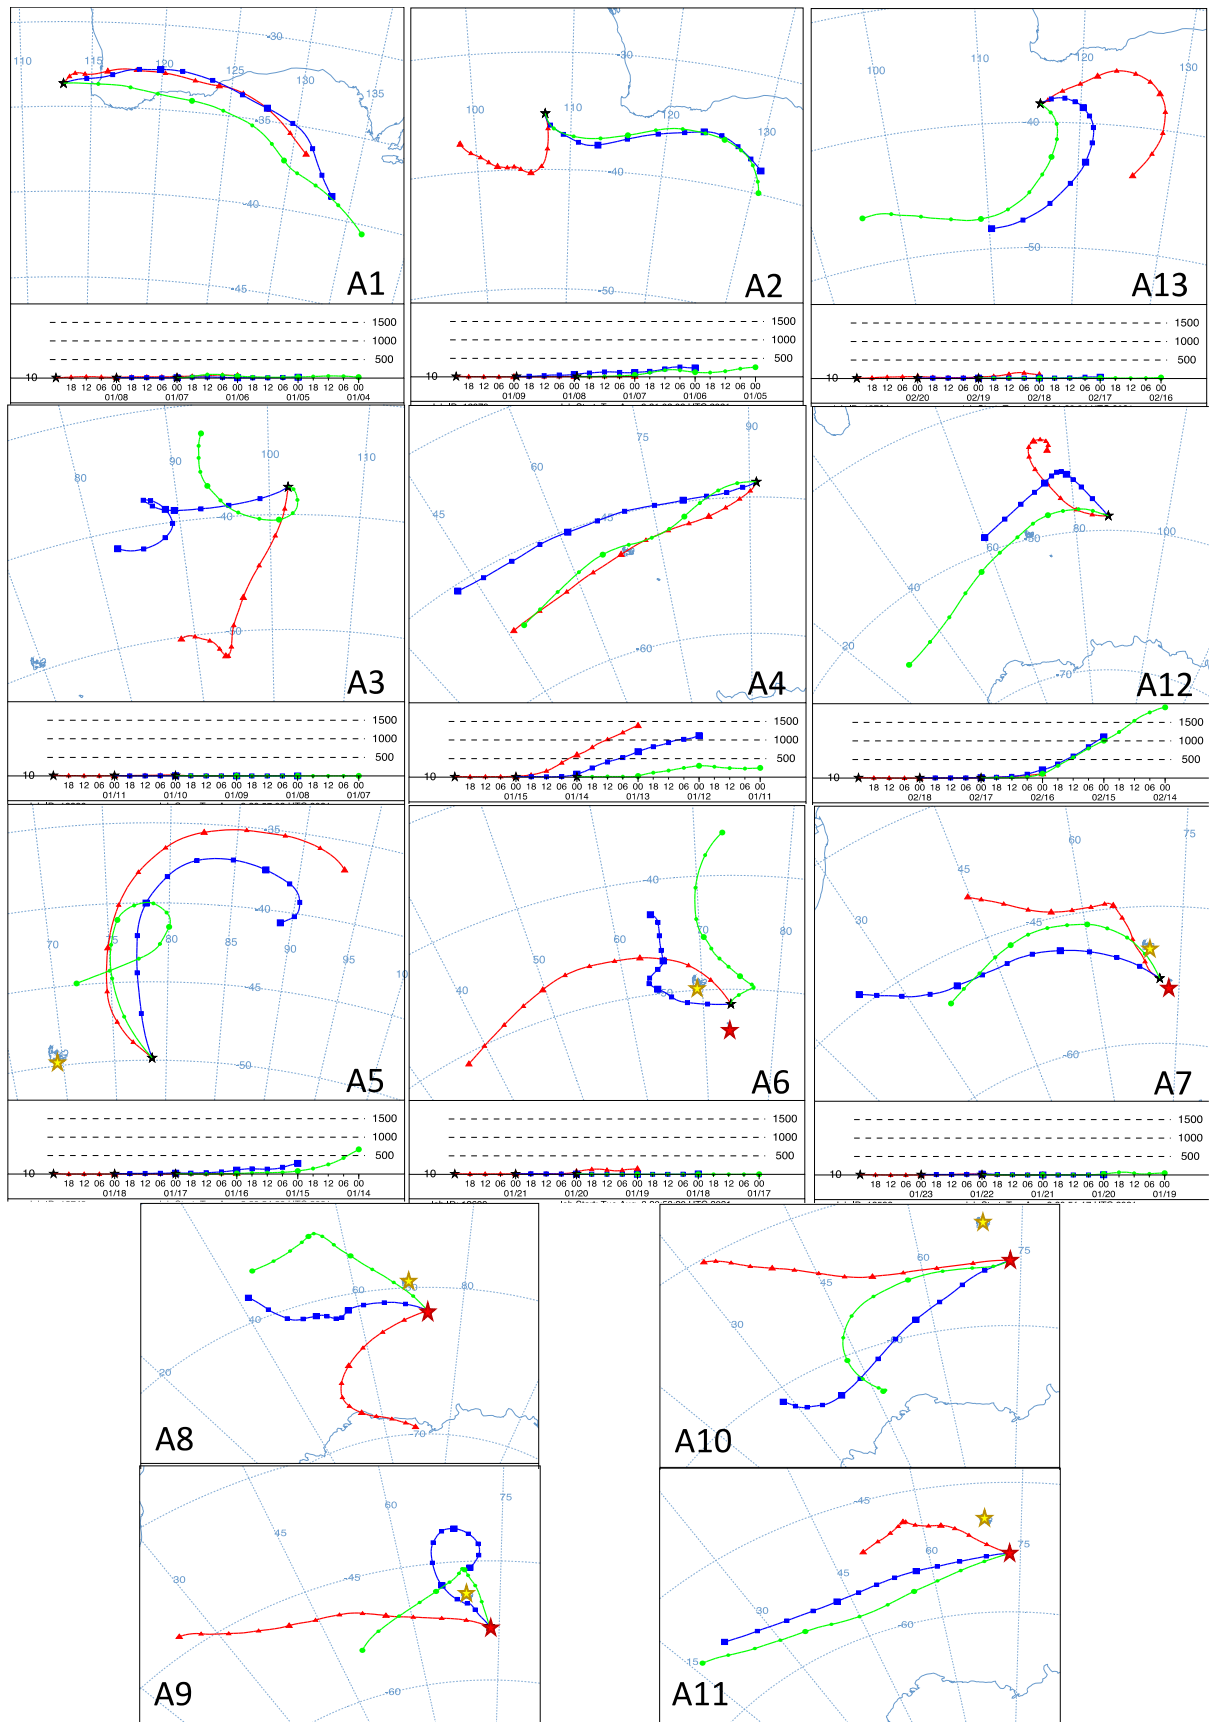

**Figure S3 (part ii).** Typical 3-day air-mass back-trajectories (length of most sample collection) obtained using the NOAA Air Resource Laboratory HYSPLIT online model for aerosols collected during the HEOBI campaign. Because HYSPLIT does not capture local

atmospheric features, it is only used in this study to dissociate samples receiving (a) prevailing oceanic influence (aerosols A3-A12) from the Southern Ocean; to (b) samples receiving terrestrial air-masses from the south western Australian coastline (aerosols A1, A2, and A13). When possible, the Kerguelen Islands and HIMI, are indicated by a yellow star and a red star, respectively.
